# Supplementary material for: Social Inequalities in Environmental Resources of Green and Blue Spaces: A Review of Evidence in the WHO European Region
Source: MDPI journal article supplement (doi:10.3390/ijerph16071216), 2019-04-04
Supplement: s2 [file s2]

### **Supplement S3: Search terms for Web of Science and Scopus**

#### **Web of Science**

TS=(disadvantaged OR disadvantage OR deprived OR social OR socio\* OR vulnerable OR vulnerability OR psychosocial OR psycho-social OR socio-economic OR deprivation OR socio-demographic)

AND

TS=("green space" OR "green spaces" OR "open space" OR "open spaces" OR "natural space" OR "natural spaces" OR "green environment" OR "green environments" OR "green area" OR "green areas" OR greenery OR greenness OR "urban green" OR "public green" OR "neighbourhood green" OR "neighborhood green" OR "natural environment" OR "natural environments" OR park OR parks OR forest OR forests OR "urban park" OR "urban parks" OR "city park" OR "city parks" OR "park access" OR "public garden" OR "public gardens" OR "blue space" OR "blue spaces" OR "blue area" OR "blue areas" OR beach OR beaches OR lake OR lakes OR river OR rivers OR sea OR "recreational space" OR "recreational spaces" OR "recreational area" OR "recreational areas" OR outdoor)

AND

TS=(inequality OR inequity OR inequities OR inequalities OR unequal OR "environmental justice" OR "environmental injustice") AND PY=(2010-2017)

*Items selected manually: Results were additionally restricted by language (English) and document types (Article)*

#### **Scopus**

ALL(disadvantaged OR disadvantage OR deprived OR social OR socio\* OR vulnerable OR vulnerability OR psychosocial OR psycho-social OR socio-economic OR deprivation OR socio-demographic) AND TITLE-ABS-KEY("green space" OR "green spaces" OR "open space" OR "open spaces" OR "natural space" OR "natural spaces" OR "green environment" OR "green environments" OR "green area" OR "green areas" OR greenery OR greenness OR "urban green" OR "public green" OR "neighbourhood green" OR "neighborhood green" OR "natural environment" OR "natural environments" OR park OR parks OR forest OR forests OR "urban park" OR "urban parks" OR "city park" OR "city parks" OR "park access" OR "public garden" OR "public gardens" OR "blue space" OR "blue spaces" OR "blue area" OR "blue areas" OR beach OR beaches OR lake OR lakes OR river OR rivers OR sea OR "recreational space" OR "recreational spaces" OR "recreational area" OR "recreational areas" OR outdoor) AND TITLE-ABS-KEY(inequality OR inequity OR inequities OR inequalities OR unequal OR "environmental justice" OR "environmental injustice") AND LANGUAGE(english) AND PUBYEAR > 2009 AND PUBYEAR < 2018 AND DOCTYPE(ar) AND NOT INDEX (medline)
