# Supplementary material for: Social Inequalities in Environmental Resources of Green and Blue Spaces: A Review of Evidence in the WHO European Region
Source: MDPI journal article supplement (doi:10.3390/ijerph16071216), 2019-04-04
Supplement: s2 [file s2]

## Supplement S2: Description of studies and reported associations on social inequalities in environmental resources

| Author, year                                            | Place of study                      | Unit of analysis, study population and sample size                            | Study type       | Operationalization of green or blue space                                                                                                                                                                                                                                                 | Socioeconomic and sociodemographic characteristics                                          | Type of analysis                                                                                                                                 | Results on environmental inequalities in symbols                                                                                                                                                                                                                                                                                                                                                                                                                                                                                                                                                                                                                                                                                                                                                        |
|---------------------------------------------------------|-------------------------------------|-------------------------------------------------------------------------------|------------------|-------------------------------------------------------------------------------------------------------------------------------------------------------------------------------------------------------------------------------------------------------------------------------------------|---------------------------------------------------------------------------------------------|--------------------------------------------------------------------------------------------------------------------------------------------------|---------------------------------------------------------------------------------------------------------------------------------------------------------------------------------------------------------------------------------------------------------------------------------------------------------------------------------------------------------------------------------------------------------------------------------------------------------------------------------------------------------------------------------------------------------------------------------------------------------------------------------------------------------------------------------------------------------------------------------------------------------------------------------------------------------|
| <b>Cross-sectional studies blue space</b>               |                                     |                                                                               |                  |                                                                                                                                                                                                                                                                                           |                                                                                             |                                                                                                                                                  |                                                                                                                                                                                                                                                                                                                                                                                                                                                                                                                                                                                                                                                                                                                                                                                                         |
| Wüstemann, 2017 (Journal: Ecological Indicators)        | Germany, 53 major cities            | <b>Individual level:</b> Adults (N=4588) from the German Socio-Economic Panel | Cross-sectional  | <b>Objective:</b> Urban blue (visible water bodies and courses >1 ha from European Urban Atlas)<br><b>Operationalization:</b> Euclidian distance to blue space from household; Amount of urban blue in a 500 m buffer around the household.                                               | Income, education, employment, migration background, German nationality, child in household | <b>Description:</b> Crosstables<br><b>Bivariate analysis:</b> T-test and F-test to compare mean values of urban blue across socioeconomic groups | <b>Description:</b><br><u>Amount of urban blue:</u><br>⊖ (with migration background; with children in household; no German nationality; low education (n.l. in middle groups))<br>⊕ (no employment, low income (n.l. in middle groups))<br><u>Distance to urban blue:</u><br>⊖ (low education (n.l. in middle groups))<br>⊕ (with migration background, low income (n.l. in middle groups), no German nationality<br>= (employment, child in household)<br><b>Bivariate:</b><br><u>Amount of urban blue :</u><br>⊖ (with migration background, no German nationality, with children in household)<br>n.s. (employment, income, education)<br><u>Distance to urban blue:</u><br>⊕ (with migration background, no German nationality)<br>n.s. (employment, income, education, with children in household) |
| Laatikainen, 2015                                       | Finland, Helsinki Metropolitan Area | <b>Individual level:</b> Adults between 15 and 75 years old (N=2031)          | Cross-sectional) | <b>Subjective:</b> Location of used aquatic environments were marked by study participants.<br><b>Operationalisation (objective):</b> Euclidean distance to nearest water, Euclidean distance to aquatic activity point, travel distance to activity point, travel time to activity point | Age, gender, employment status, income, car ownership, home ownership                       | <b>Bivariate analysis:</b> Mann-Whitney U test                                                                                                   | <b>Bivariate:</b><br><u>Distance to nearest water</u><br>⊖ (low income, no car, no home ownership)<br>⊕ (no employment status, age (≥65 years) <sup>1)</sup> )<br>n.s. (gender)<br><u>Distance to aquatic activity point</u><br>⊕ (sex (female) <sup>2)</sup> , no employment status, no car, no home ownership)<br>n.s. (income, age (≥65 years))<br><u>Travel distance to activity point</u><br>⊕ (no employment status, low income, no car, no home ownership)<br>n.s. (age (≥65 years), sex)<br><u>Travel time to activity point</u><br>⊖ (low income)<br>n.s. (employment status, age (≥65 years), sex, car ownership, home ownership)                                                                                                                                                             |
| <b>Cross-sectional studies green space</b>              |                                     |                                                                               |                  |                                                                                                                                                                                                                                                                                           |                                                                                             |                                                                                                                                                  |                                                                                                                                                                                                                                                                                                                                                                                                                                                                                                                                                                                                                                                                                                                                                                                                         |
| Wüstemann, 2017 (Journal: Landscape and Urban Planning) | Germany, 53 major cities            | <b>Individual level:</b> Adults (N=4588) from the German Socio-Economic Panel | Cross-sectional  | <b>Objective:</b> Green urban areas and forests (land use categories from European Urban Atlas)<br><b>Operationalisation:</b> Euclidian distance to green from household; Amount of urban green in a 500 m buffer around household                                                        | Income, age, gender, education, employment, migration background, German nationality        | <b>Description:</b> Crosstables<br><b>Multivariate analysis:</b> multiple linear regression adjusted for city                                    | <b>Description:</b><br><u>Amount of green:</u><br>⊖ (with migration background, low income (n.l. in middle groups), low education, no employment, no German nationality)<br>⊕ (age (≥65 years))<br>= (gender)<br><u>Distance to green:</u><br>⊖ (low income (n.l. in middle groups), no employment, low education (n.l. in middle groups), gender (female))                                                                                                                                                                                                                                                                                                                                                                                                                                             |

|                                       |                                                         |                                                                                                            |                       |                                                                                                                                                                                                                                                                                                                                                         |                                                                                     |                                                                                                                                                                                                                                                                                                                |                                                                                                                                                                                                                                                                                                                                                                                                                                                                                                                                                                                                                                                                                                   |
|---------------------------------------|---------------------------------------------------------|------------------------------------------------------------------------------------------------------------|-----------------------|---------------------------------------------------------------------------------------------------------------------------------------------------------------------------------------------------------------------------------------------------------------------------------------------------------------------------------------------------------|-------------------------------------------------------------------------------------|----------------------------------------------------------------------------------------------------------------------------------------------------------------------------------------------------------------------------------------------------------------------------------------------------------------|---------------------------------------------------------------------------------------------------------------------------------------------------------------------------------------------------------------------------------------------------------------------------------------------------------------------------------------------------------------------------------------------------------------------------------------------------------------------------------------------------------------------------------------------------------------------------------------------------------------------------------------------------------------------------------------------------|
|                                       |                                                         |                                                                                                            |                       |                                                                                                                                                                                                                                                                                                                                                         |                                                                                     |                                                                                                                                                                                                                                                                                                                | <p>⊕ (age (≥65 years) (n.l. in middle groups), no German nationality)<br/>= (migration background)</p> <p><b>Multivariate:</b><br/> <u>Amount of green space:</u><br/> ⊖ (low income, low education)<br/> ⊕ (age (≥65 years), children in household)<br/> n.s. (migration background, German nationality, no employment)<br/> <u>Distance to green:</u><br/> n.s. (for all socioeconomic measures)</p>                                                                                                                                                                                                                                                                                            |
| Zandieh, 2017                         | UK (city of Birmingham)                                 | <b>Individual level:</b><br>Adults ≥65 years (n=173)                                                       | Cross-sectional study | <p><b>Objective:</b> Green space (land use data comprising public parks and gardens, natural green spaces, amenity green spaces)</p> <p><b>Operationalisation:</b><br/>Percentage of green space in a 2 km buffer around the home address.</p>                                                                                                          | Ethnicity                                                                           | <b>Bivariate:</b> Pearson's correlation coefficient                                                                                                                                                                                                                                                            | <p><b>Bivariate:</b><br/> <u>Percentage of green space:</u><br/> ⊖ (black and minority ethnic groups)</p>                                                                                                                                                                                                                                                                                                                                                                                                                                                                                                                                                                                         |
| Markevych, 2017                       | Germany (city of Munich, Leipzig, Bad Honnef and Wesel) | <b>Individual level:</b><br>Parents (Munich (n=1865); Leipzig (n=337); Bad Honnef (n=155); Wesel (n=1439)) | Cross-sectional study | <p><b>Objective:</b> Green space based on remote sensing data (Normalized differenced vegetation index (NDVI) and tree cover)</p> <p><b>Operationalisation:</b><br/>Mean NDVI and percent of tree cover in a 500 and 1000 m buffer around home address</p>                                                                                              | Household income (individual level); German Deprivation index on municipality level | <b>Multivariate:</b> linear regression analysis by city. Cities are considered as effect modifiers on the pathway between SEP and green space. Simultaneous consideration of income and deprivation index adjusted further for number of children and study type                                               | <p><b>Multivariate:</b><br/> <u>NDVI (both buffers)</u><br/> ⊖ (low income (Munich, Leipzig); high deprivation (Munich, Wesel))<br/> ⊕ (low income (Wesel))<br/> n.s. (income (Bad Honnef); high deprivation (Bad Honnef, Leipzig))<br/> <u>Tree cover (both buffers)</u><br/> ⊖ (low income (Munich); high deprivation (Munich))<br/> ⊕ (high deprivation (Wesel))<br/> n.s. (income (Leipzig, Bad Honnef, Wesel); high deprivation (Bad Honnef, Leipzig))</p>                                                                                                                                                                                                                                   |
| <b>Ecological studies green space</b> |                                                         |                                                                                                            |                       |                                                                                                                                                                                                                                                                                                                                                         |                                                                                     |                                                                                                                                                                                                                                                                                                                |                                                                                                                                                                                                                                                                                                                                                                                                                                                                                                                                                                                                                                                                                                   |
| Hoffmann, 2017                        | Portugal (city of Porto)                                | <b>Aggregated level:</b> census tracts (N=2064)                                                            | Ecological study      | <p><b>Objective:</b> Public green spaces (N=55) from the Porto city council</p> <p><b>Operationalisation:</b><br/>Availability of green space (Yes/No) within 800 m road distance from neighbourhood centroid; Mean distance to green spaces within 800 m; Number of green spaces within 800 m; Amount of green spaces per inhabitant within 800 m.</p> | Deprivation index                                                                   | <p><b>Description:</b><br/>Crosstables</p> <p><b>Bivariate:</b> ordinal regression</p> <p><b>Multivariate:</b> Ordinal regression (Dependent variable: Deprivation Index; Independent variables: Green space variables and quality indicators of green spaces, (environmental quality, amenities, safety))</p> | <p><b>Description:</b><br/> <u>Availability of green space (yes vs. no) within 800 m road distance</u><br/> ⊖ (high deprivation)<br/> <u>Number of green spaces:</u><br/> ⊖ (high deprivation (n.l. in middle groups))<br/> <u>Distance to green spaces:</u><br/> ⊖ (high deprivation (n.l. in middle groups))<br/> <u>Amount of green spaces per inhabitant:</u><br/> ⊖ (high deprivation (n.l. in middle groups))<br/> <b>Bivariate:</b><br/> <u>Availability of green space</u><br/> ⊖ (high deprivation)<br/> <u>Number of green spaces:</u><br/> ⊖ (high deprivation)<br/> <u>Distance to green spaces:</u><br/> ⊖ (high deprivation)<br/> <u>Amount of green spaces per inhabitant:</u></p> |

|               |                                    |                                                                                                               |                  |                                                                                                                                                                                                                                                                                                                                                                               |                                                                                                                                                     |                                                                                                                                                                                                  |                                                                                                                                                                                                                                                                                                                                                                               |
|---------------|------------------------------------|---------------------------------------------------------------------------------------------------------------|------------------|-------------------------------------------------------------------------------------------------------------------------------------------------------------------------------------------------------------------------------------------------------------------------------------------------------------------------------------------------------------------------------|-----------------------------------------------------------------------------------------------------------------------------------------------------|--------------------------------------------------------------------------------------------------------------------------------------------------------------------------------------------------|-------------------------------------------------------------------------------------------------------------------------------------------------------------------------------------------------------------------------------------------------------------------------------------------------------------------------------------------------------------------------------|
|               |                                    |                                                                                                               |                  |                                                                                                                                                                                                                                                                                                                                                                               |                                                                                                                                                     |                                                                                                                                                                                                  | n.s. (Deprivation Index)<br><b>Multivariate:</b><br><u>Availability of green space</u><br>n.s. (deprivation index)<br><u>Number of green spaces:</u><br>n.s. (deprivation index)<br><u>Distance to green spaces:</u><br>⊖ (high deprivation)<br><u>Amount of green spaces per inhabitant:</u><br>n.s. (deprivation index)                                                     |
| Kabisch, 2014 | Germany<br>(city of Berlin)        | <b>Aggregated level:</b> sub-districts (n=60); three spatial clusters from cluster analysis (n=28; n=9; n=23) | Ecological study | <b>Objective:</b> Green space per sub-district (land use data comprising forests, parks, cemeteries, allotment gardens, brownfields with vegetation)<br><b>Operationalisation:</b> Percentage per sub-district                                                                                                                                                                | Percentage of immigrants (three spatial cluster categories); percentage of individuals ≥65 years (three spatial cluster categories)                 | <b>Description:</b><br>Crosstables (prevalence of urban green and the two socioeconomic factors across the three clusters) ; Figures (Lorenz curve based on calculation of the GINI coefficient) | <b>Description crosstable:</b><br><u>Percentage of green space:</u><br>⊖ (high amount of immigrants (n.l. in middle groups))<br>⊕ (age (high amount of inhabitants ≥65 years))<br><b>Description Lorenz curve:</b><br><u>Percentage of green space:</u><br>⊖ (high amount of immigrants)<br>⊕ (age (high amount of inhabitants ≥65 years))                                    |
| Kabisch, 2016 | Germany<br>(city of Berlin)        | <b>Aggregated level:</b> sub-districts (n=60)                                                                 | Ecological study | <b>Objective:</b> Natural areas (land use data comprising forests, urban green and parks, cemeteries, allotment gardens, waterbodies (lakes, rivers, canals))<br><b>Operationalisation:</b> Percentage of natural areas, m <sup>2</sup> of natural areas per inhabitant, availability (percentage of inhabitants living a maximum of 300 m distance away from a natural area) | Social status index of parents; percentage of children living in single parent households; Percentage of children with background other than German | <b>Bivariate:</b> Spearman's correlation coefficient                                                                                                                                             | <b>Bivariate:</b><br><u>Percentage of natural areas</u><br>n.s. (social status index, non-German, single parent households)<br><u>m<sup>2</sup> of natural areas per inhabitant</u><br>⊖ (non-German)<br>n.s. (social status index, single parent households)<br><u>Availability of natural areas</u><br>⊖ (low social status)<br>n.s. (non-German, single parent households) |
| Zandieh, 2017 |                                    | <b>Aggregated level:</b> Combination of electoral wards (n=2; Low deprivation area vs. high deprivation area) | Ecological study | <b>Objective:</b> Green space (land use data comprising public parks and gardens, natural green spaces, amenity green spaces)<br><b>Operationalisation:</b> Percentage of green space per area                                                                                                                                                                                | Deprivation Index                                                                                                                                   | <b>Bivariate:</b> t-test                                                                                                                                                                         | <b>Bivariate:</b><br><u>Percentage of green space:</u><br>⊖ (high deprivation)                                                                                                                                                                                                                                                                                                |
| Padilla, 2016 | France<br>(Nice metropolitan area) | <b>Aggregated level:</b> census tracts (N=236)                                                                | Ecological study | <b>Objective:</b> Green space (land use data comprising natural areas)<br><b>Operationalisation:</b> Percentage of green space per census tract                                                                                                                                                                                                                               | Deprivation Index                                                                                                                                   | <b>Bivariate:</b> Spearman's correlation coefficient                                                                                                                                             | <b>Bivariate:</b><br><u>Percentage of green space:</u><br>⊖ (high deprivation)                                                                                                                                                                                                                                                                                                |
| Lakes, 2014   | Germany<br>(city of)               | <b>Aggregated level:</b> Planning                                                                             | Ecological study | <b>Objective:</b> Green space based on remote sensing                                                                                                                                                                                                                                                                                                                         | Deprivation Index                                                                                                                                   | <b>Bivariate:</b> Pearson's correlation coefficient                                                                                                                                              | <b>Bivariate:</b><br><u>Mean NDVI:</u><br>⊖ (high deprivation)                                                                                                                                                                                                                                                                                                                |
